# Supplementary material for: Outcome Expectations in Psychotherapy: Validation of the Therapy Single Category Implicit Association Test (Therapy SC-IAT)
Source: Springer Nature journal article supplement (doi:10.1007/s10608-023-10413-5), 2023-07-25
Supplement: MOESM1 [file 25847860]

Supplemental Material

Outcome Expectations in Psychotherapy: Validation of the Therapy Single Category Implicit Association Test (Therapy SC-IAT)

**Supplemental Material**

***Pilot Studies of the Words Used in the Therapy SC-IAT***

Participants (*N* = 25) who did not take part in the present study pre-rated 25 words for each category of the Therapy SC-IAT. We measured valence ratings (How negative or positive do you find the term below?) on a 7-point Likert-type scale ranging from 1 (very negative) to 7 (very positive). In addition, we measured typicality ratings (How typical do you find the term below for the category *psychotherapy* [vs. *effective* vs. *unhelpful*]*?*) on a 7-point Likert-type scale ranging from 1 (not typical at all) to 7 (very typical). Furthermore, we calculated word length and frequency ratings (word frequency 2020 determined via DWDS newspaper corpus; https://www.dwds.de/). Table S1 presents all word ratings.

From these word ratings, five word were chosen for the attribute categories *effective* (German: wirksam, wirkungsvoll, effektiv, effektvoll, hilfreich) and *unhelpful* (German: nutzlos, unnütz, unnötig, überflüssig, sinnlos) and the target category *psychotherapy* (German: Psychotherapie, Therapie, Psychologische Behandlung, Therapeutisches Gespräch, Therapeutische Sitzung). Every word had high typicality ratings (*M* = 5.76, *SD* = 0.64, range = 4.56–6.84). The three categories did not differ in terms of typicality, *F*(2,12) = 0.70, *p* = .51, Bayes' factor (BF) BF10 = 0.46, or frequency ratings, *F*(2,12) = 1.04, *p* = .38, BF10 = 0.54. Valence ratings of *psychotherapy* words were more positive compared to *unhelpful* words, *F*(1,8) = 301.70, *p* < .001, BF10 > 100, and less positive compared to *effective* words, *F*(1,8) = 14.04, *p* = .006, BF10 = 7.72. The attribute categories *effective* and *unhelpful* did not significantly differ in terms of word length, *F*(1,8) = 1.71, *p* = .23, BF10 = 0.81.

For the Flower SC-IAT, we used the attribute categories *positive* (German: Leckerbissen, Diamant, Humor, Charme, Herzlichkeit) and *negative* (German: Untauglichkeit, Notfall, Makel, Rückschritt, Einbuße) and the target category *flowers* (German: Nelke, Seerose, Lilie, Orchidee, Tulpe).

**Table S1**

*Mean Word Ratings (SD) Dependent on Category*

|  | Psychotherapy | Effective | Unhelpful | *F*(2,12) | *p* | BF10 |
| --- | --- | --- | --- | --- | --- | --- |
| Typicality | 5.81 (0.54) | 5.93 (0.60) | 5.52 (0.86) | 0.47 | .63 | 0.40 |
| Valence | 5.00 (0.13) | 5.77 (0.19) | 1.97 (0.22) | 601.50 | < .001 | > 100 |
| Frequency | 3174.2  (5679.78) | 8343.0 (6082.88) | 5036.0 (5405.39) | 1.04 | .38 | 0.54 |
| Word Length | 18.00 (6.82) | 9.2 (1.92) | 7.6 (1.95) | 8.71 | .005 | 10.10 |

*Notes.* Typicality = subjective rating of the participants (1 = not at all typical, 7 = very typical). Valence = subjective rating of the participants (1 = very negative, 7 = very positive). Frequency = word frequency 2020 determined via DWDS newspaper corpus. Word length = number of letters. BF10 describes the strength of evidence for the alternative hypothesis.

**Reaction Times of SC-IATs**

**Table S2**

*Mean Reaction Times in Milliseconds Dependent on SC-IAT with Standard Deviations*

|  | SC-IAT | | | |
| --- | --- | --- | --- | --- |
|  | Therapy SC-IAT | | Flower SC-IAT | |
| Reaction Time | *M* | *SD* | *M* | *SD* |
| Positive/Effective Block | 678.00 | 85.25 | 669.37 | 84.00 |
| Negative/Unhelpful Block | 737.02 | 94.12 | 746.66 | 91.23 |
| Both Blocks | 707.51 | 83.14 | 708.02 | 82.13 |

*Notes.* Mean Reaction time of all trials that were included in the *D*-score Calculation. The standard deviations of all reaction times after applying scoring rules (including error responses with the 400 ms penalty). Positive Block includes the psychotherapy-effective or flower-positive block. Negative Block includes the psychotherapy-unhelpful or flower-negative block.

**Mean Direct and Indirect Scores**

**Table S3**

*Mean Indirect and Direct Scores Dependent on Demographics*

|  | *D-*Score Therapy | | *D-*Score Flower | | Therapy Self-Report | | CEQ | | ATSPPH | |
| --- | --- | --- | --- | --- | --- | --- | --- | --- | --- | --- |
| Variable | *M* | *SD* | *M* | *SD* | *M* | *SD* | *M* | *SD* | *M* | *SD* |
| Gender |  |  |  |  |  |  |  |  |  |  |
| Women | 0.41 | 0.44 | 0.56 | 0.37 | 1.89 | 0.86 | 6.52 | 1.57 | 21.79 | 4.23 |
| Men | 0.40 | 0.42 | 0.45 | 0.39 | 1.52 | 1.09 | 5.95 | 1.77 | 19.68 | 5.02 |
| Non-binary | 0.14 | 0.09 | 0.68 | 0.27 | 1.40 | 1.95 | 6.70 | 1.01 | 18.60 | 5.81 |
|  |  |  |  |  |  |  |  |  |  |  |
| Nationality |  |  |  |  |  |  |  |  |  |  |
| German | 0.41 | 0.43 | 0.53 | 0.38 | 1.79 | 0.94 | 6.36 | 1.66 | 21.14 | 4.59 |
| German and Other | 0.39 | 0.54 | 0.52 | 0.30 | 1.56 | 1.22 | 6.21 | 1.64 | 20.98 | 4.87 |
| Other | 0.32 | 0.38 | 0.40 | 0.45 | 2.17 | 0.51 | 6.88 | 1.24 | 22.78 | 2.80 |
|  |  |  |  |  |  |  |  |  |  |  |
| Education |  |  |  |  |  |  |  |  |  |  |
| Primary/Secondary | 0.49 | 0.58 | 0.61 | 0.49 | 1.66 | 1.12 | 6.39 | 1.72 | 20.57 | 4.69 |
| Higher Levela | 0.39 | 0.41 | 0.51 | 0.36 | 1.81 | 0.92 | 6.35 | 1.63 | 21.30 | 4.55 |
|  |  |  |  |  |  |  |  |  |  |  |
| Experience |  |  |  |  |  |  |  |  |  |  |
| No Experience | 0.36 | 0.42 | 0.52 | 0.38 | 1.67 | 0.97 | 6.15 | 1.68 | 20.11 | 4.62 |
| Some Experience | 0.47 | 0.45 | 0.54 | 0.37 | 1.95 | 0.92 | 6.66 | 1.56 | 22.65 | 4.09 |
|  |  |  |  |  |  |  |  |  |  |  |
| Current Problem |  |  |  |  |  |  |  |  |  |  |
| No Problem | 0.37 | 0.41 | 0.49 | 0.38 | 1.78 | 0.87 | 6.20 | 1.59 | 20.68 | 4.34 |
| Current Problem | 0.44 | 0.45 | 0.56 | 0.38 | 1.79 | 1.03 | 6.50 | 1.68 | 21.60 | 4.74 |

*Notes.* aHigher education level includes currently studying at a university or already obtained a university degree. Experience = Generic Rating Scale for Previous Treatment Experiences, Treatment Expectations, and Treatment Effects (GEEE); Anxiety = Generalized Anxiety Disorder Screener (GAD-7); Depression = Patient Health Questionnaire (PHQ-9); Self-Report = Self-Report Scores (range = -3–3); ATSPPH = Attitudes Toward Seeking Professional Psychological Help (range = 0–30); CEQ = Credibility Expectancy Questionnaire (range = 1–9).

**Influence of Psychological Disorders (Exploratory Analysis)**

**Mental Health Difficulties (MHD; Silverman et al., 2021).** Participants completed a translated German version of this questionnaire to assess current or past mental health difficulties. They rated whether they *currently, in the past, currently and in the past*, or *never* struggled with anxiety disorders, depressive disorders, eating disorders, addictive disorders, neurocognitive disorders, bipolar disorders, schizophrenia spectrum or other psychotic disorders, obsessive-compulsive and related disorders, trauma and stress-related disorders, personality disorders, or with another mental disorder. We used a transformed scale into a binary variable (0 = *no current problem [past and never]*, 1 = *current problem*) for our exploratory comparisons of interest.

We tested linear models, including all disorders, to predict indirectly and directly measured outcome expectations. Sleep disorder significantly predicted Therapy *D*-scores but did not predict Flower *D*-scores. A current sleep disorder (vs. no sleep disorder) endorsed more positive indirectly measured outcome expectations.

Depression significantly predicted self-reports, CEQ, and ATSPPH scores. A current depression (vs. no depression) endorsed more positive directly measured outcome expectations. Substance use disorder significantly predicted self-reports, CEQ, and ATSPPH scores. A current substance use disorder (vs. no substance use disorder) endorsed less positive directly measured outcome expectations. Table S4 displays the indirect and direct scores dependent on psychological disorders.

**Table S4**

*Mean Indirect and Direct Scores Dependent on Psychological Disorder*

|  |  | *D-*Score Therapy | | | | *D-*Score Flower | | | | Therapy Self-Report | | | | CEQ | | | | ATSPPH | | |
| --- | --- | --- | --- | --- | --- | --- | --- | --- | --- | --- | --- | --- | --- | --- | --- | --- | --- | --- | --- | --- |
| Variable | *n (%)* | *M* | | *SD* | | *M* | | *SD* | | *M* | | *SD* | | *M* | | *SD* | | *M* | | *SD* |
| Depression |  |  | |  | |  | |  | |  | |  | |  | |  | |  | |  |
| Not Current | 535 (75.9) | 0.40 | | 0.45 | | 0.52 | | 0.38 | | 1.75 | | 0.96 | | 6.23 | | 1.64 | | 20.90 | | 4.56 |
| Current | 170 (24.1) | 0.41 | | 0.38 | | 0.55 | | 0.38 | | 1.88 | | 0.94 | | 6.78 | | 1.59 | | 22.03 | | 4.53 |
| Test Statistic |  | *b* = 0.01, *SE* = 0.02, *p* = .69 | | | | *b* = -0.01, *SE* = 0.02, *p* = .74 | | | | *b* = -0.10, *SE* = 0.05, *p* = .04 | | | | *b* = -0.29, *SE* = 0.08, *p* < .001 | | | | *b* = -0.56, *SE* = 0.23, *p* = .02 | | |
|  |  | |  | |  | |  | |  | |  | |  | |  | |  | |  | |
| Sleep Disorder |  |  | |  | |  | |  | |  | |  | |  | |  | |  | |  |
| Not Current | 575 (81.6) | 0.37 | | 0.41 | | 0.51 | | 0.37 | | 1.80 | | 0.88 | | 6.37 | | 1.59 | | 21.23 | | 4.44 |
| Current | 130 (18.4) | 0.57 | | 0.49 | | 0.59 | | 0.41 | | 1.72 | | 1.23 | | 6.31 | | 1.87 | | 20.94 | | 5.14 |
| Test Statistic |  | *b* = -0.10, *SE* = 0.02, *p* < .001 | | | | *b* = -0.03, *SE* = 0.02, *p* = .17 | | | | *b* = 0.08, *SE* = 0.05, *p* = .12 | | | | *b* = 0.12, *SE* = 0.08, *p* = .15 | | | | *b* = 0.34, *SE* = 0.23, *p* = .15 | | |
|  |  |  | |  | |  | |  | |  | |  | |  | |  | |  | |  |
| SUD |  |  | |  | |  | |  | |  | |  | |  | |  | |  | |  |
| Not Current | 670 (95.0) | 0.40 | | 0.43 | | 0.53 | | 0.38 | | 1.80 | | 0.93 | | 6.40 | | 1.61 | | 21.27 | | 4.51 |
| Current | 35 (5.0) | 0.45 | | 0.49 | | 0.47 | | 0.28 | | 1.51 | | 1.38 | | 5.69 | | 2.11 | | 19.37 | | 5.48 |
| Test Statistic |  | *b* = 0.02, *SE* = 0.05, *p* = .61 | | | | *b* = 0.04, *SE* = 0.04, *p* = .26 | | | | *b* = 0.28, *SE* = 0.10, *p* = .003 | | | | *b* = 0.64, *SE* = 0.17, *p* < .001 | | | | *b* = 1.38, *SE* = 0.46, *p* = .003 | | |

*Notes.* We reported only disorders which were significant predictors of at least one indirect or direct measure. SUD = substance use disorder; Self-Report = Self-Report Scores (range = -3–3); ATSPPH = Attitudes Toward Seeking Professional Psychological Help (range = 0–30); CEQ = Credibility Expectancy Questionnaire (range = 1–9).

**Exploratory Analysis with Different *D*-Score Calculations**

With the Greenwald scoring (Table S5), we had to exclude 22 participants in the Therapy SC-IAT (resulting in *N*[Therapy *D*-Scores] = 683) and 25 participants in the Flower SC-IAT (resulting in *N*[Flower *D*-Scores] = 680) because they had error rates greater than 20 %. The Therapy SC-IAT (adjusted *r* = .65) and the Flower SC-IAT (adjusted *r* = .59) demonstrated still reasonable internal consistency in this study. The indirectly measured associations of therapy with effective (*M* = 0.33, *SD* = 0.33) and flower with positive (*M* = 0.41, *SD* = 0.30) decreased slightly. The convergent validity increased as the Therapy *D*‑scores were significantly positively correlated with all direct measures of OE (also CEQ), with Bayes factors indicating anecdotal to strong evidence (Therapy self-reports: BF10 = 2.86, ATSPPH: BF10 = 44.19, CEQ: BF01 = 1.51, motivation: BF10 = 11.43). All other results did not differ between the two scorings. All results are displayed in Table S6, Table S7, and Table S8.

**Table S5**

*Comparison of D-Score Calculation*

| *D*-Scores by Karpinski and Steinman (2006) |  | *D*-Scores by Greenwald et al. (2003) |
| --- | --- | --- |
| - 1. Exclude practice trials   2. Exclude trials with a response time below 350 ms   3. Exclude trials in which the participant did not respond in the given time (1.500 ms)   4. Exclude participants who have error rates greater than 20 %   5. If participants respond incorrectly, the mean of all trials in this block plus a 400 ms error penalty will be used as response time for this trial   *D*-score = (*M*Block2 – *M*Block1) / *SD*allCorrectResponses |  | 1. Include practice trials because of better reliability and validity (Richetin; 2015, Greenwald et al., 2003) 2. Exclude trials with latencies higher than 1.500 msa 3. Exclude participants for whom more than 10% of the trials have latencies faster than 300 ms 4. Include participants with high error rates 5. If participants respond incorrectly, the mean of all trials in this block plus a 600 ms error penalty will be used as response time for this trial   *D*-score = (*M*Block2 – *M*Block1) / *SD*allBlocks |

*Notes.* aGreenwald recommended eliminating trials with latencies > 10.000 ms. This study included an upper boundary of 1.500 ms, after which no reaction was possible. Therefore, we used this cutoff as an exclusion criterion in the scoring by Greenwald et al. (2003). The R scripts for both *D*-score calculations are uploaded at OSF: <https://osf.io/b5sva/>.

**Table S6**

*Correlations of Study Variables with Greenwald et al., 2013*

|  | 1 | 2 | 3 | 4 | 5 | 6 | 7 |
| --- | --- | --- | --- | --- | --- | --- | --- |
| 1. Therapy *D*-Score | – |  |  |  |  |  |  |
| 2. Therapy Self-Report | .10** | – |  |  |  |  |  |
| 3. ATSPPH | .13*** | .61*** | – |  |  |  |  |
| 4. CEQ | .08* | .59*** | .58*** | – |  |  |  |
| 5. Motivation | .12** | .50*** | .59*** | .59*** | – |  |  |
| 6. Flower *D*-Score | .11** | -.06 | .00 | -.02 | 0.04 | – |  |
| 7. Flower Self-Report | .08 | .06 | .01 | .04 | 0.04 | .07 | – |

*Notes.* Self-Report = Self-Report Scores; ATSPPH = Attitudes Toward Seeking Professional Psychological Help; CEQ = Credibility Expectancy Questionnaire.

**p* < .05. ***p* < .01. ****p* < .001.

**Table S7**

*Mean Indirect Scores Calculated by Greenwald et al. (2013) Dependent on Psychological Disorder*

|  |  | *D-*Score Therapy | | | | *D-*Score Flower | | |
| --- | --- | --- | --- | --- | --- | --- | --- | --- |
| Variable | *n (%)* | *M* | | *SD* | | *M* | | *SD* |
| Depression |  |  | |  | |  | |  |
| Not Current | 535 (75.9) | 0.32 | | 0.34 | | 0.41 | | 0.30 |
| Current | 170 (24.1) | 0.36 | | 0.32 | | 0.42 | | 0.30 |
| Test Statistic |  | *b* = -0.01, *SE* = 0.02, *p* = .77 | | | | *b* = 0.00, *SE* = 0.02, *p* = .81 | | |
|  |  |  |  | |  | |  | |
| Sleep Disorder |  |  | |  | |  | |  |
| Not Current | 575 (81.6) | 0.31 | | 0.32 | | 0.40 | | 0.30 |
| Current | 130 (18.4) | 0.44 | | 0.36 | | 0.44 | | 0.32 |
| Test Statistic |  | *b* = -0.06, *SE* = 0.02, *p* < .001 | | | | *b* = -0.02, *SE* = 0.02, *p* = .27 | | |
|  |  |  | |  | |  | |  |
| SUD |  |  | |  | |  | |  |
| Not Current | 670 (95.0) | 0.33 | | 0.33 | | 0.41 | | 0.30 |
| Current | 35 (5.0) | 0.40 | | 0.41 | | 0.36 | | 0.22 |
| Test Statistic |  | *b* = 0.00, *SE* = 0.03, *p* = .92 | | | | *b* = 0.02, *SE* = 0.03, *p* = .52 | | |

*Notes. N*(total)= 705.We reported only disorders which were significant predictors of at least one indirect or direct measure. SUD = substance use disorder.

**Table S8**

*Regression Analysis of Therapy D-Scores by Greenwald et al. (2013)*

|  | Therapy *D*-Scores | | | | |  | Flower *D*-Scores | | | | |
| --- | --- | --- | --- | --- | --- | --- | --- | --- | --- | --- | --- |
| Variable | *n* (%)  ***M* (*SD*)** | *b* | *SE* | *p* | BF10 |  | *n* (%)  ***M* (*SD*)** | *b* | *SE* | *p* | BF10 |
| Age | **30.82 (12.76)** | 0.01 | 0.00 | <.001 | >100 |  | **30.86 (12.81)** | 0.00 | 0.00 | .002 | 29.90 |
|  |  |  |  |  |  |  |  |  |  |  |  |
| Gender |  |  |  |  |  |  |  |  |  |  |  |
| Women | 489 (71.6) |  |  |  |  |  | 486 (71.5) |  |  |  |  |
| Men | 190 (27.8) | 0.00 | 0.03 | .96 | 0.26 |  | 190 (27.9) | -0.10 | 0.03 | <.001 | >100 |
| Non-binary | 4 (0.6) | -0.25 | 0.16 | .13 | 0.79 |  | 4 (0.6) | 0.22 | 0.15 | .15 | 0.72 |
|  |  |  |  |  |  |  |  |  |  |  |  |
| Nationality |  |  |  |  |  |  |  |  |  |  |  |
| German | 624 (91.4) |  |  |  |  |  | 623 (91.6) |  |  |  |  |
| German and other | 42 (6.1) | 0.01 | 0.05 | .92 | 0.26 |  | 41 (6.0) | 0.05 | 0.05 | .29 | 0.41 |
| Other | 17 (2.5) | -0.04 | 0.08 | .61 | 0.29 |  | 16 (2.4) | -0.13 | 0.08 | .08 | 1.00 |
|  |  |  |  |  |  |  |  |  |  |  |  |
| Education |  |  |  |  |  |  |  |  |  |  |  |
| Primary/Secondary | 107 (15.7) |  |  |  |  |  | 106 (15.6) |  |  |  |  |
| Higher levela | 576 (84.3) | 0.00 | 0.02 | .84 | 0.14 |  | 574 (84.4) | 0.00 | 0.02 | .91 | 0.13 |
|  |  |  |  |  |  |  |  |  |  |  |  |
| Experience |  |  |  |  |  |  |  |  |  |  |  |
| No Experience | 400 (58.6) |  |  |  |  |  | 398 (58.5) |  |  |  |  |
| Some Experience | 283 (41.4) | -0.03 | 0.01 | .06 | 0.73 |  | 282 (41.5) | 0.00 | 0.01 | .76 | 0.10 |
|  |  |  |  |  |  |  |  |  |  |  |  |
| Current Problem |  |  |  |  |  |  |  |  |  |  |  |
| No Problem | 315 (46.1) |  |  |  |  |  | 314 (46.2) |  |  |  |  |
| Current Problem | 368 (53.9) | -0.01 | 0.02 | .42 | 0.17 |  | 366 (53.8) | -0.02 | 0.01 | .16 | 0.30 |
|  |  |  |  |  |  |  |  |  |  |  |  |
| Anxiety | **5.56 (4.72)** | 0.01 | 0.00 | .21 | 0.61 |  | **5.51 (4.69)** | 0.00 | 0.00 | .65 | 0.26 |
|  |  |  |  |  |  |  |  |  |  |  |  |
| Depression | **7.12 (5.44)** | 0.00 | 0.00 | .87 | 0.27 |  | **7.08 (5.39)** | 0.00 | 0.00 | .89 | 0.25 |
| *R*2 | .08 | | | | |  | .05 | | | | |

*Notes.* *N*(Therapy *D*-Scores) = 683. *N*(Flower *D*-Scores) = 680. Bold print indicates mean values and standard deviations. The first displayed category was used as the reference category. *b* represents unstandardized regression weights. aHigher education level includes currently studying at a university or already obtained a university degree. Experience = Generic Rating Scale for Previous Treatment Experiences, Treatment Expectations, and Treatment Effects (GEEE); Anxiety = Generalized Anxiety Disorder Screener (GAD-7); Depression = Patient Health Questionnaire (PHQ-9). BF10 demonstrates evidence strength in favor of the alternative hypothesis.

**Investigation of Influences on Correlations**

**Table S9**

*Correlations of Study Variables When Therapy SC-IAT was Displayed First*

|  | 1 | 2 | 3 | 4 | 5 | 6 | 7 |
| --- | --- | --- | --- | --- | --- | --- | --- |
| 1. Therapy *D*-Score | – |  |  |  |  |  |  |
| 2. Therapy Self-Report | .11† | – |  |  |  |  |  |
| 3. ATSPPH | .13* | .58*** | – |  |  |  |  |
| 4. CEQ | .09† | .60*** | .54*** | – |  |  |  |
| 5. Motivation | .11† | .50*** | .56*** | .56*** | – |  |  |
| 6. Flower *D*-Score | .21*** | .07 | .05 | .01 | .03 | – |  |
| 7. Flower Self-Report | .04 | .05 | .04 | .01 | .00 | .08 | – |

*Notes.* *N*(direct measures)= 359. *N*(Therapy SC-IAT)= 314. *N*(Flower SC-IAT)= 321. Self-Report = Self-Report Scores; ATSPPH = Attitudes Toward Seeking Professional Psychological Help; CEQ = Credibility Expectancy Questionnaire.

†*p* ≤ .10. **p* < .05. ****p* < .001.

**Table S10**

*Correlations of Study Variables When Flower SC-IAT was Displayed First*

|  | 1 | 2 | 3 | 4 | 5 | 6 | 7 |
| --- | --- | --- | --- | --- | --- | --- | --- |
| 1. Therapy *D*-Score | – |  |  |  |  |  |  |
| 2. Therapy Self-Report | .05 | – |  |  |  |  |  |
| 3. ATSPPH | .04 | .64*** | – |  |  |  |  |
| 4. CEQ | .05 | .58*** | .61*** | – |  |  |  |
| 5. Motivation | .09† | .50*** | .63*** | .62*** | – |  |  |
| 6. Flower *D*-Score | .07 | -.13* | -.06 | -.04 | .01 | – |  |
| 7. Flower Self-Report | .11* | .06 | -.01 | .06 | .06 | .02 | – |

*Notes.* *N*(direct measures)= 346. *N*(Therapy SC-IAT)= 309. *N*(Flower SC-IAT)= 304. Self-Report = Self-Report Scores; ATSPPH = Attitudes Toward Seeking Professional Psychological Help; CEQ = Credibility Expectancy Questionnaire.

†*p* ≤ .10. **p* < .05 ****p* < .001.

**Table S11**

*Correlations of Study Variables in Participants* ***With******no*** *Current Psychological Problem*

|  | 1 | 2 | 3 | 4 | 5 | 6 | 7 |
| --- | --- | --- | --- | --- | --- | --- | --- |
| 1. Therapy *D*-Score | – |  |  |  |  |  |  |
| 2. Therapy Self-Report | .15* | – |  |  |  |  |  |
| 3. ATSPPH | .15** | .61*** | – |  |  |  |  |
| 4. CEQ | .12* | .54*** | .52*** | – |  |  |  |
| 5. Motivation | .18** | .50*** | .59*** | .54*** | – |  |  |
| 6. Flower *D*-Score | .13* | .04 | .04 | .02 | .07 | – |  |
| 7. Flower Self-Report | .11† | .15** | .04 | .11† | .11* | .10† | – |

*Notes.* *N*(direct measures)= 325. *N*(Therapy SC-IAT)= 291. *N*(Flower SC-IAT)= 289. Self-Report = Self-Report Scores; ATSPPH = Attitudes Toward Seeking Professional Psychological Help; CEQ = Credibility Expectancy Questionnaire.

†*p* ≤ .10. **p* < .05. ***p* < .01. ****p* < .001.

**Table S12**

*Correlations of Study Variables in Participants* ***With*** *Current Psychological Problem*

|  | 1 | 2 | 3 | 4 | 5 | 6 | 7 |
| --- | --- | --- | --- | --- | --- | --- | --- |
| 1. Therapy *D*-Score | – |  |  |  |  |  |  |
| 2. Therapy Self-Report | .03 | – |  |  |  |  |  |
| 3. ATSPPH | .03 | .62*** | – |  |  |  |  |
| 4. CEQ | .03 | .63*** | .61*** | – |  |  |  |
| 5. Motivation | .03 | .51*** | .58*** | .62*** | – |  |  |
| 6. Flower *D*-Score | .16** | -.09† | -.06 | -.06 | -.05 | – |  |
| 7. Flower Self-Report | .05 | -.01 | -.01 | -.01 | -.02 | .02 | – |

*Notes.* *N*(direct measures)= 380. *N*(Therapy SC-IAT)= 332. *N*(Flower SC-IAT)= 336. Self-Report = Self-Report Scores; ATSPPH = Attitudes Toward Seeking Professional Psychological Help; CEQ = Credibility Expectancy Questionnaire.

†*p* ≤ .10. ***p* < .01. ****p* < .001.
